# Supplementary material for: Fear, foraging and olfaction: how mesopredators avoid costly interactions with apex predators
Source: PubMed Central journal article supplement (PMC6018578; doi:10.1007/s00442-018-4133-3), 2018-04-13
Supplement: 442_2018_4133_MOESM1_ESM.pdf [file 442_2018_4133_MOESM1_ESM.pdf]

**Table 1:** Considerations proposed for the application of the giving-up density framework in field research and how the methodologies created in this paper accounted for these considerations.

| Considerations                                                     | Author(s)                                       | This study                                                                                                                                                                                                                                                                                                                                                                 |
|--------------------------------------------------------------------|-------------------------------------------------|----------------------------------------------------------------------------------------------------------------------------------------------------------------------------------------------------------------------------------------------------------------------------------------------------------------------------------------------------------------------------|
| Patches aren't natural.                                            | Brown (1988)                                    | Natural substrate (soil), patches were used by foxes during the 2014 pilot study.                                                                                                                                                                                                                                                                                          |
| Inappropriate food resources offered.                              |                                                 | Food was consumed by foxes during the 2014 pilot study.                                                                                                                                                                                                                                                                                                                    |
| Foragers may become satiated.                                      |                                                 | Sargeant (1978) found captive kept adult daily food consumption ranging from 266 – 541g per day. Wild foxes presumably consume more food and each site contained 480g per day. All food was consumed from a site during the 2014 pilot study; the volume of food unlikely satiates as foxes continued to visit before patches were replenished (PMH <i>unpubl. data</i> ). |
| Visits by more than one forager.                                   |                                                 | Camera identification of last visiting species but individual identification by pelage not possible.                                                                                                                                                                                                                                                                       |
| Curvilinearity between harvest rate & energy/ diminishing returns. | Bedoya-Perez et al. (2013)                      | Depletable food in a suitable volume of inedible matrix (pilot study). Patches were only harvested to empty on 11 occasions from 195 GUDs suggesting diminishing returns were experienced.                                                                                                                                                                                 |
| Energetic state of forager.                                        |                                                 | Signs of mange or parasite grooming behaviours were not observed from videos. Data collected on multiple occasions. Single national park. No hunting sites or human food subsidies in study area.                                                                                                                                                                          |
| Effects of group foraging.                                         |                                                 | Almost entirely solitary foraging, 2 foxes were only observed on 3 out of 790 videos and even when observed together only the behaviour of one fox at a time was identifiable, i.e. one fox departed from or was only part in camera shot as the other arrived.                                                                                                            |
| Food quality & substrate properties.                               |                                                 | Target species utilised both during the pilot study.                                                                                                                                                                                                                                                                                                                       |
| Predictability of patch.                                           |                                                 | Duration was limited to avoid the magic pudding effect. Conservative use of wolf urine as the second treatment. We deemed that there was less expectation of a response to wolf urine given its application later in the test procedure when foxes would be more familiar and reliant upon food patches.                                                                   |
| Behavioural traits.                                                |                                                 | Analysis of behavioural/ temporal strategies from video observations.                                                                                                                                                                                                                                                                                                      |
| Non-target species.                                                | Camera identification of last visiting species. |                                                                                                                                                                                                                                                                                                                                                                            |

## References

Bedoya-Perez MA, Carthey AJR, Mella VSA, McArthur C, Banks PB (2013) A practical guide to avoid giving up on giving-up densities. *Behav Ecol Sociobiol* 67:1541-1553. doi: 10.1007/s00265-013-1609-3

Brown JS (1988) Patch use as an indicator of habitat preference, predation risk, and competition. *Behav Ecol Sociobiol* 22:37-47. doi: 10.1007/bf00395696

Sargeant AB (1978) Red fox prey demands and implications to prairie duck production. *J Wildlife Manage* 42:520-527. doi: 10.2307/3800813
